# Supplementary material for: Fermentation of cv. Kalamata Natural Black Olives with Potential Multifunctional Yeast Starters
Source: MDPI journal article supplement (doi:10.3390/foods11193106), 2022-10-06
Supplement: s1 [file s1]

(GTG)5

(GTG)5

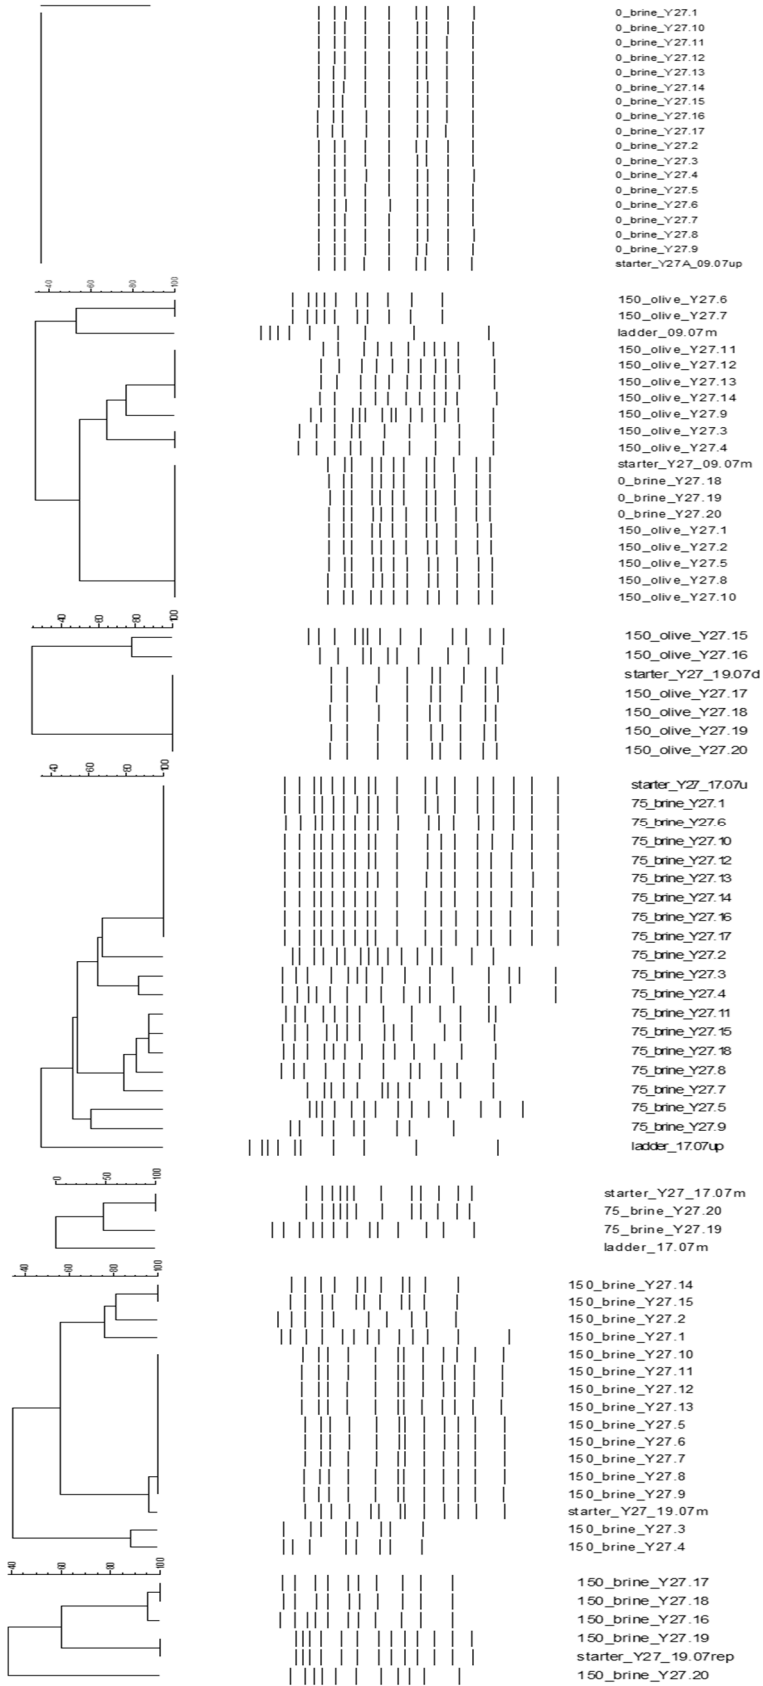

(A)

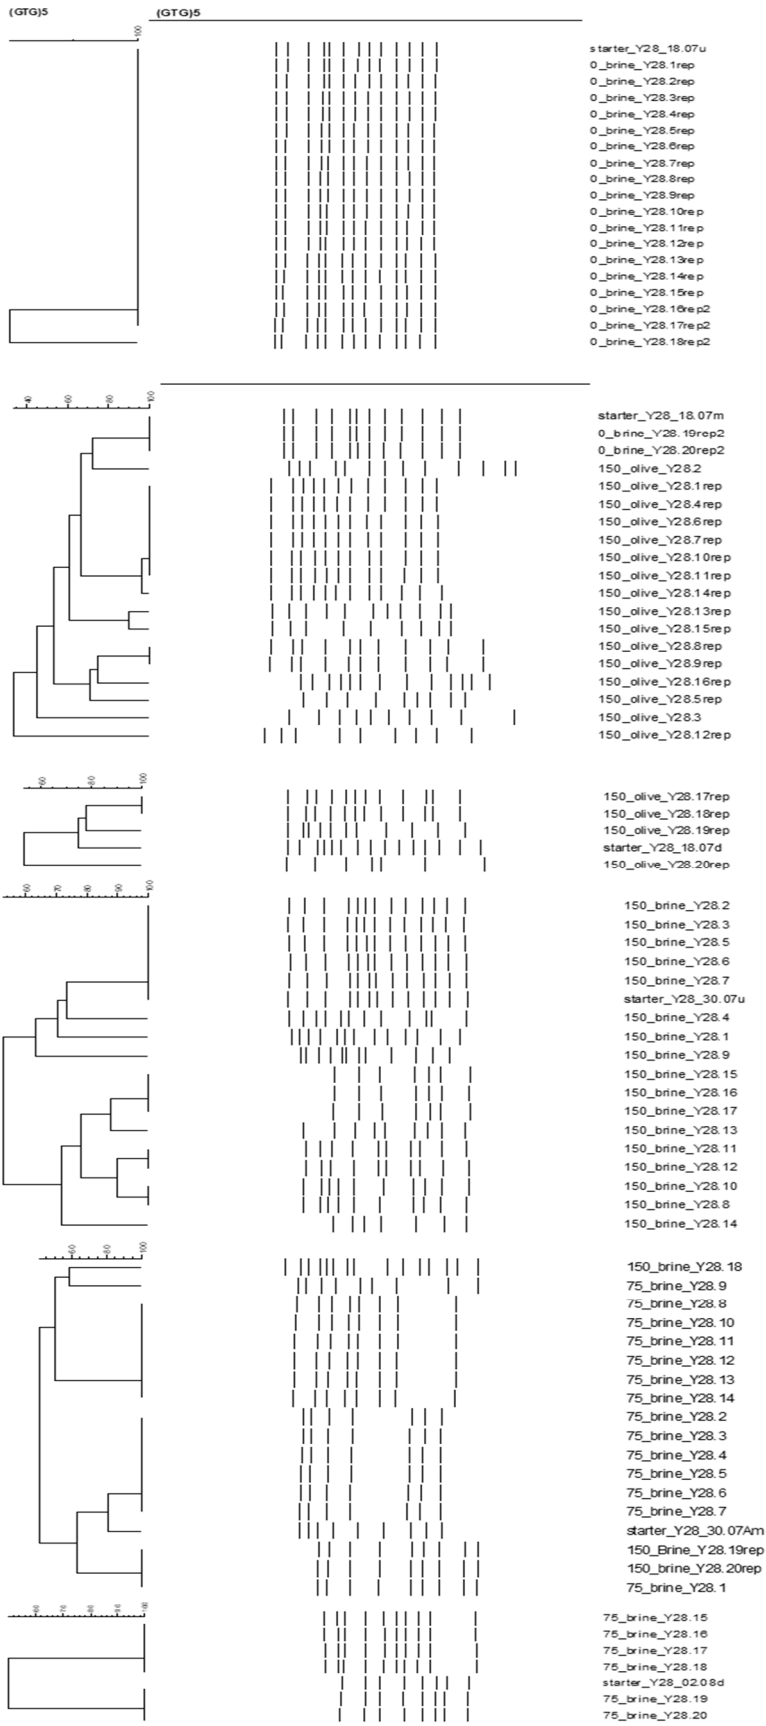

(B)

(GTG)5

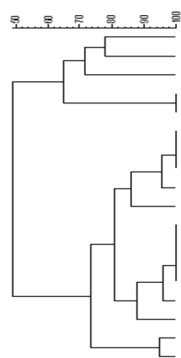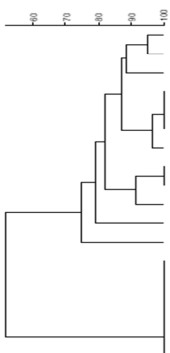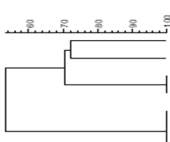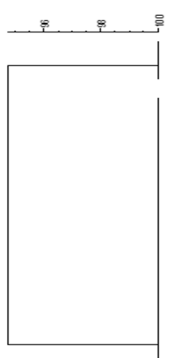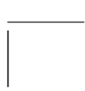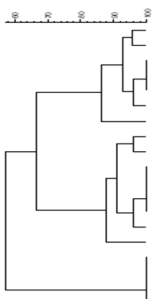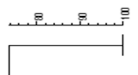

(GTG)5

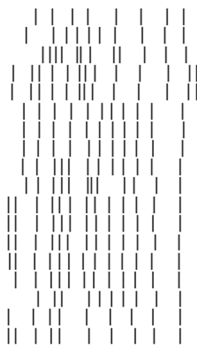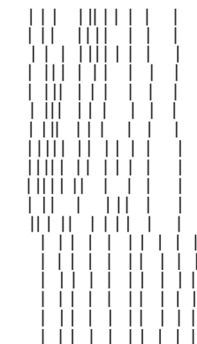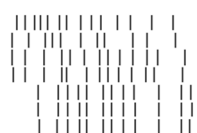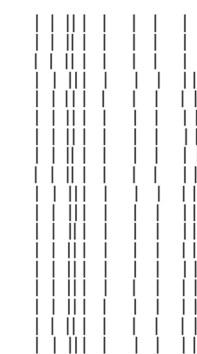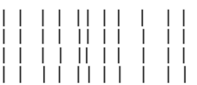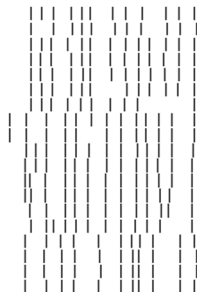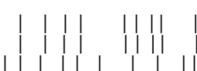

150\_olive\_Y30.15rep  
150\_olive\_Y30.9rep  
150\_olive\_Y30.17rep  
150\_olive\_Y30.8rep  
starter\_Y30A\_16.07u  
150\_olive\_Y30.10rep  
150\_olive\_Y30.11rep  
150\_olive\_Y30.12rep  
150\_olive\_Y30.13rep  
150\_olive\_Y30.16rep  
150\_olive\_Y30.3rep  
150\_olive\_Y30.4rep  
150\_olive\_Y30.5rep  
150\_olive\_Y30.7rep  
150\_olive\_Y30.6rep  
150\_olive\_Y30.14rep  
150\_olive\_Y30.1rep  
150\_olive\_Y30.2rep

150\_olive\_Y30.18rep  
150\_olive\_Y30.20rep  
75\_brine\_Y30.6rep  
75\_brine\_Y30.1rep  
75\_brine\_Y30.2rep  
75\_brine\_Y30.3rep  
75\_brine\_Y30.4rep  
75\_brine\_Y30.12rep  
75\_brine\_Y30.13rep  
75\_brine\_Y30.14rep  
75\_brine\_Y30.10rep  
75\_brine\_Y30.9rep  
150\_olive\_Y30.19rep  
75\_brine\_Y30.11rep  
75\_brine\_Y30.5rep  
75\_brine\_Y30.7rep  
75\_brine\_Y30.8rep  
starter\_Y30A\_16.07m

75\_brine\_Y30.15rep  
75\_brine\_Y30.18rep  
75\_brine\_Y30.19rep  
75\_brine\_Y30.20rep  
75\_brine\_Y30.16rep  
75\_brine\_Y30.17rep  
starter\_Y30\_16.07d

0\_Brine\_Y30.14  
0\_Brine\_Y30.15  
0\_Brine\_Y30.17  
0\_Brine\_Y30.1  
0\_Brine\_Y30.10  
0\_Brine\_Y30.11  
0\_Brine\_Y30.12  
0\_Brine\_Y30.13  
0\_Brine\_Y30.16  
0\_Brine\_Y30.2  
0\_Brine\_Y30.3  
0\_Brine\_Y30.4  
0\_Brine\_Y30.5  
0\_Brine\_Y30.6  
0\_Brine\_Y30.7  
0\_Brine\_Y30.8  
0\_Brine\_Y30.9  
starter\_Y30\_10.07

0\_Brine\_Y30.18  
0\_Brine\_Y30.19  
0\_Brine\_Y30.20  
starter\_Y30A\_10.07m

150\_brine\_Y30.17rep  
150\_brine\_Y30.18rep  
150\_brine\_Y30.13rep  
150\_brine\_Y30.14rep  
150\_brine\_Y30.15rep  
150\_brine\_Y30.12rep  
150\_brine\_Y30.3rep  
150\_brine\_Y30.4rep  
150\_brine\_Y30.5rep  
150\_brine\_Y30.6rep  
150\_brine\_Y30.7rep  
150\_brine\_Y30.8rep  
150\_brine\_Y30.10rep  
150\_brine\_Y30.11rep  
150\_brine\_Y30.1rep  
150\_brine\_Y30.2rep  
starter\_Y30\_31.07u

150\_brine\_Y30.19  
150\_brine\_Y30.20  
starter\_Y30\_31.07d

(C)

(GTG)5

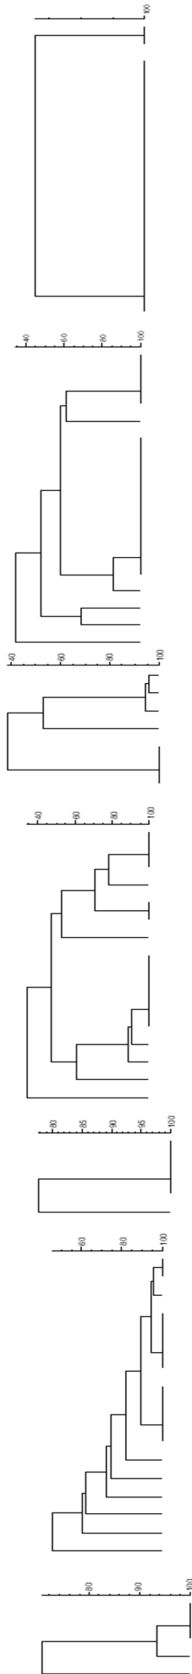

(GTG)5

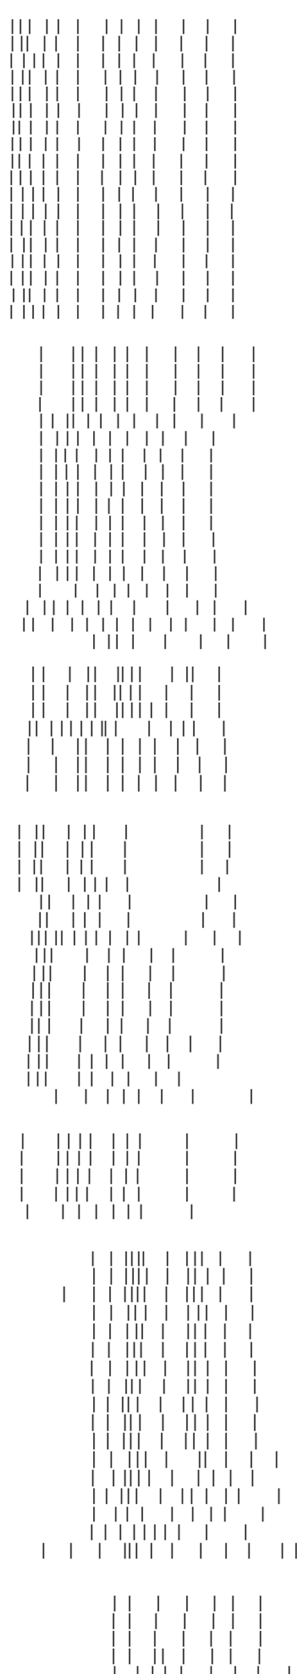

0\_brine\_Y31.12  
0\_brine\_Y31.9  
0\_brine\_Y31.1  
0\_brine\_Y31.10  
0\_brine\_Y31.11  
0\_brine\_Y31.13  
0\_brine\_Y31.14  
0\_brine\_Y31.15  
0\_brine\_Y31.16  
0\_brine\_Y31.17  
0\_brine\_Y31.2  
0\_brine\_Y31.3  
0\_brine\_Y31.4  
0\_brine\_Y31.5  
0\_brine\_Y31.6  
0\_brine\_Y31.7  
0\_brine\_Y31.8  
starter\_Y31A\_13.07u

0\_brine\_Y31.18  
0\_brine\_Y31.19  
0\_brine\_Y31.20  
starter\_Y31A\_13.  
150\_olive\_Y31.1  
150\_olive\_Y31.10  
150\_olive\_Y31.2  
150\_olive\_Y31.3  
150\_olive\_Y31.4  
150\_olive\_Y31.5  
150\_olive\_Y31.6  
150\_olive\_Y31.7  
150\_olive\_Y31.8  
150\_olive\_Y31.9  
150\_olive\_Y31.13  
150\_olive\_Y31.12  
150\_olive\_Y31.14  
150\_olive\_Y31.11

150\_olive\_Y31.16  
150\_olive\_Y31.18  
150\_olive\_Y31.17  
150\_olive\_Y31.15  
150\_olive\_Y31.19  
150\_olive\_Y31.20  
starter\_Y31\_13.07d

75\_brine\_Y31.3  
75\_brine\_Y31.4  
75\_brine\_Y31.5  
75\_brine\_Y31.1  
75\_brine\_Y31.14  
75\_brine\_Y31.15  
starter\_Y31\_20.07m  
75\_brine\_Y31.6  
75\_brine\_Y31.7  
75\_brine\_Y31.8  
75\_brine\_Y31.9  
75\_brine\_Y31.10  
75\_brine\_Y31.11  
75\_brine\_Y31.12  
75\_brine\_Y31.13  
75\_brine\_Y31.16

starter\_Y31\_20.07d  
75\_brine\_Y31.17  
75\_brine\_Y31.18  
75\_brine\_Y31.19  
75\_brine\_Y31.20

150\_brine\_Y31.1  
150\_brine\_Y31.3  
150\_brine\_Y31.2  
150\_brine\_Y31.4  
150\_brine\_Y31.6  
150\_brine\_Y31.7  
150\_brine\_Y31.8  
150\_brine\_Y31.9  
150\_brine\_Y31.12  
150\_brine\_Y31.10  
150\_brine\_Y31.11  
150\_brine\_Y31.5  
150\_brine\_Y31.14  
150\_brine\_Y31.13  
150\_brine\_Y31.16  
150\_brine\_Y31.15  
starter\_Y31\_30.07Bm

150\_brine\_Y31.17  
150\_brine\_Y31.18  
150\_brine\_Y31.20  
150\_brine\_Y31.19  
starter\_Y31\_30.07

(D)

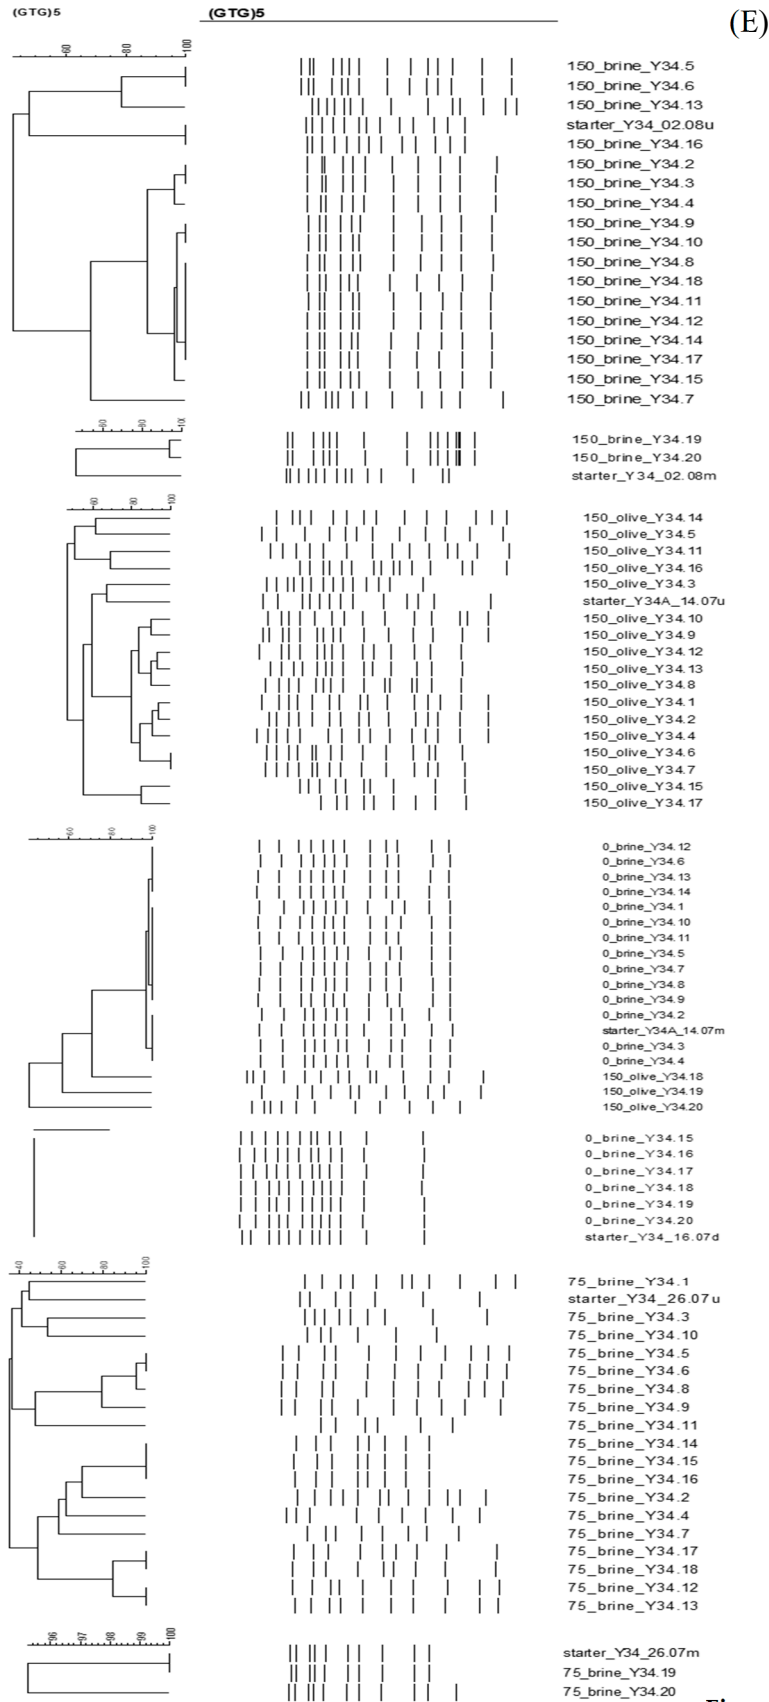

**Figure S1.** Cluster analysis of rep-PCR patterns of the isolates comparing to starters for the three sampling points (0, 75, and 150 days) in the brines and olives for the five inoculated fermentations: (A) *C. boidinii* Y27, (B) *C. boidinii* Y28, (C) *C. boidinii* Y30, (D) *C. boidinii* Y31, and (E) *S. cerevisiae* Y34. Distance is indicated by the mean correlation coefficient [r (%)] and clustering was performed by UPGMA analysis.
